# Supplementary material
Source: PubMed Central journal article supplement (PMC3075879)

# Supplementary Figure 9

a.

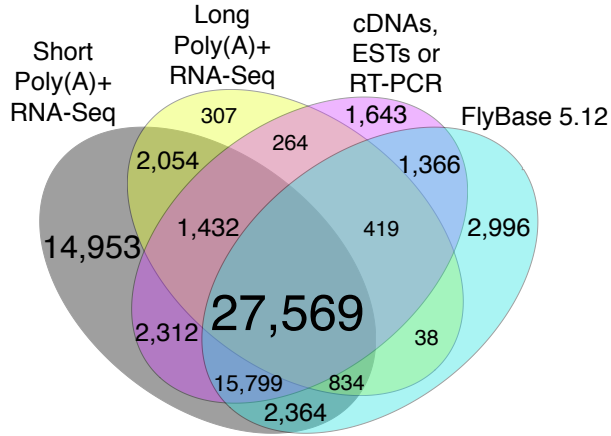

b.

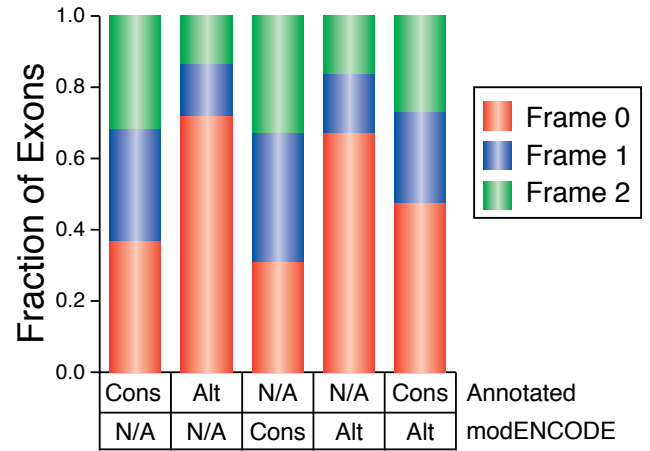

c.

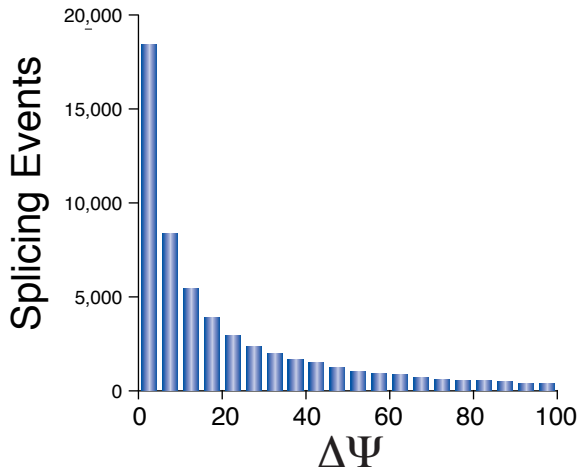

d.

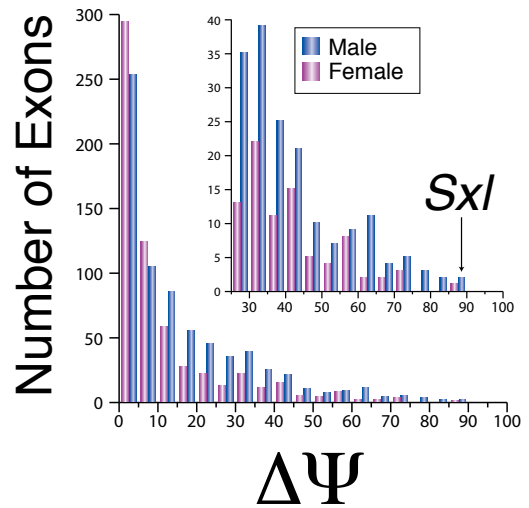

e.

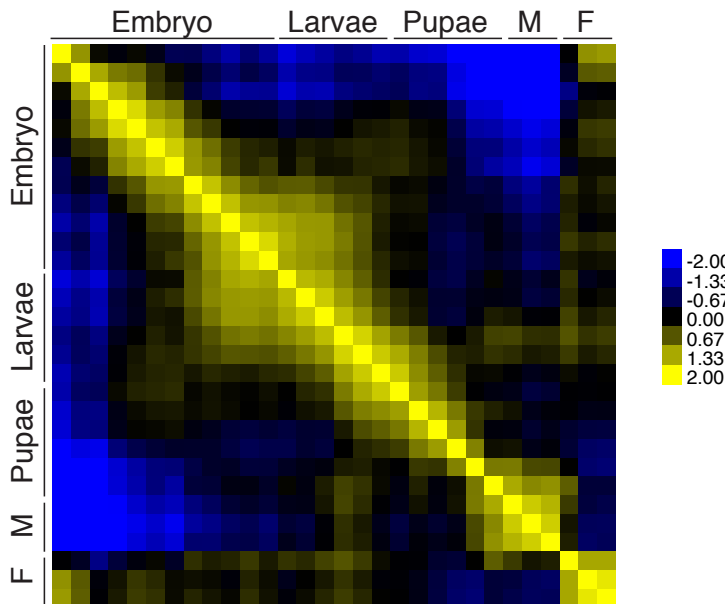

Supplement: NIHMS256122-supplement-10.pdf [file NIHMS256122-supplement-10.pdf]

# Supplementary Figure 10

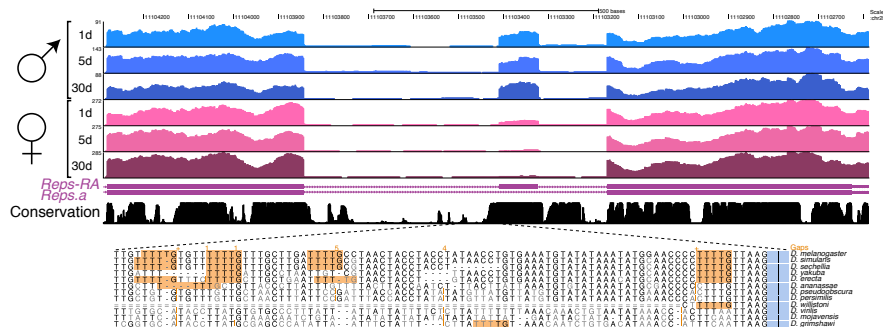

Supplement: NIHMS256122-supplement-11.pdf [file NIHMS256122-supplement-11.pdf]

# Supplementary Figure 11

a.

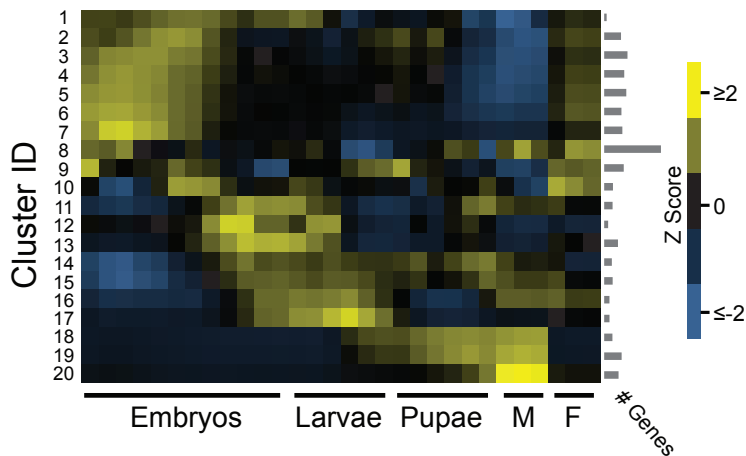

b.

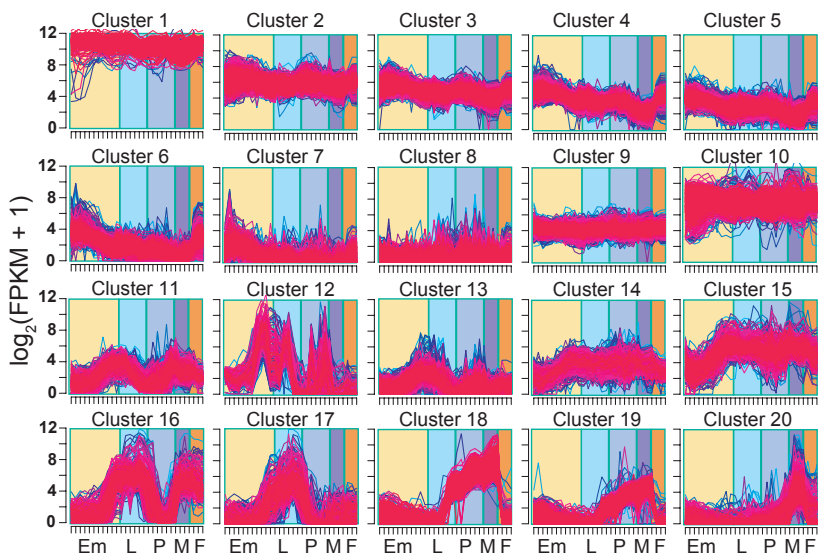

Graveley *et al.*

Supplement: NIHMS256122-supplement-12.pdf [file NIHMS256122-supplement-12.pdf]

# 1026 Putative Noncoding NTRs

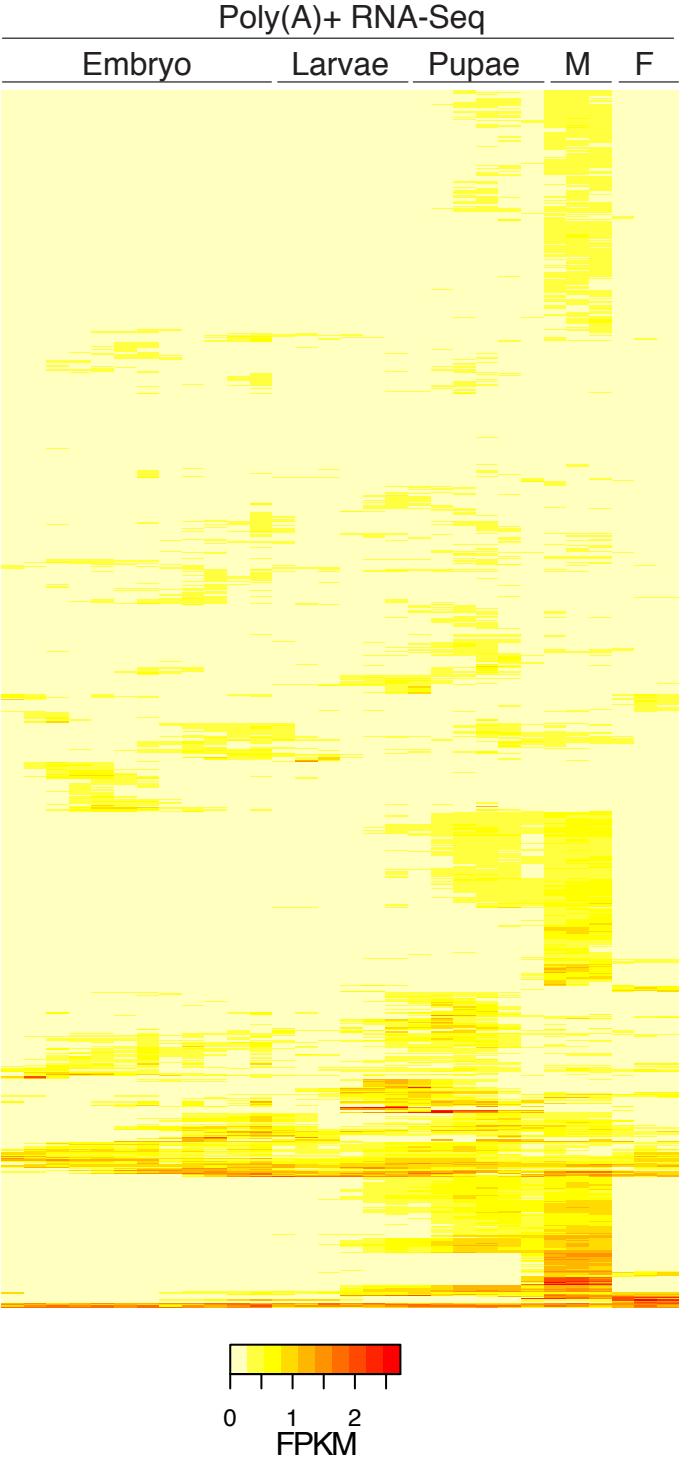

Supplement: NIHMS256122-supplement-13.pdf [file NIHMS256122-supplement-13.pdf]

# Supplementary Figure 13

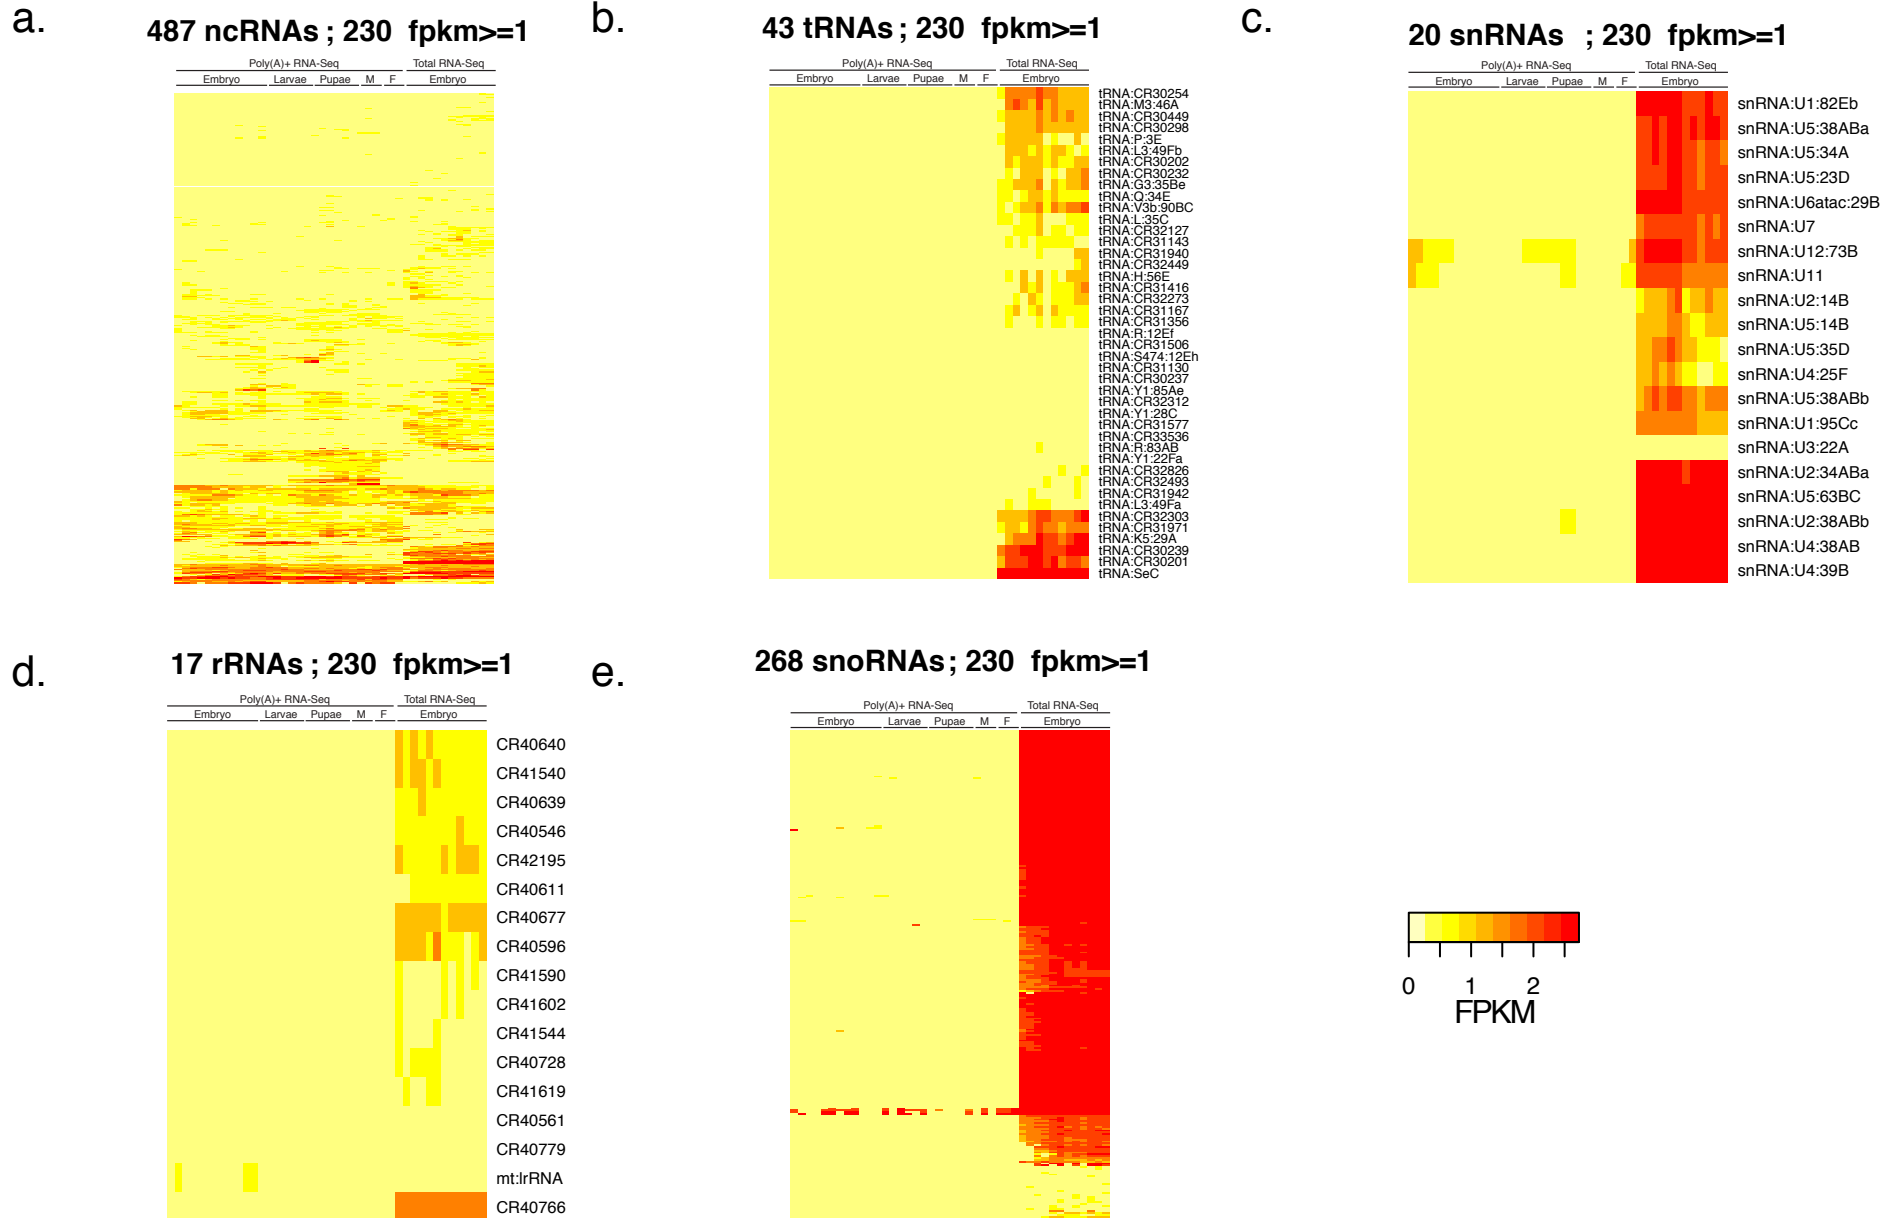

Supplement: NIHMS256122-supplement-14.pdf [file NIHMS256122-supplement-14.pdf]

# Supplementary Figure 1

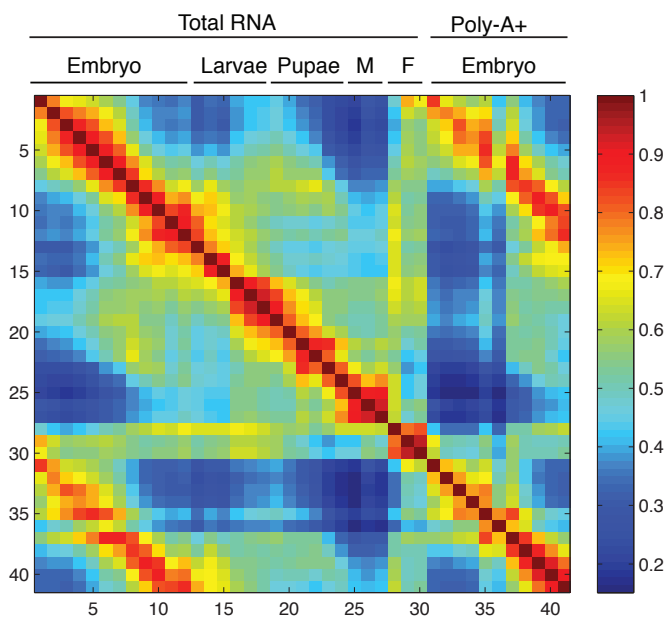

Supplement: NIHMS256122-supplement-2.pdf [file NIHMS256122-supplement-2.pdf]

# Supplementary Figure 2

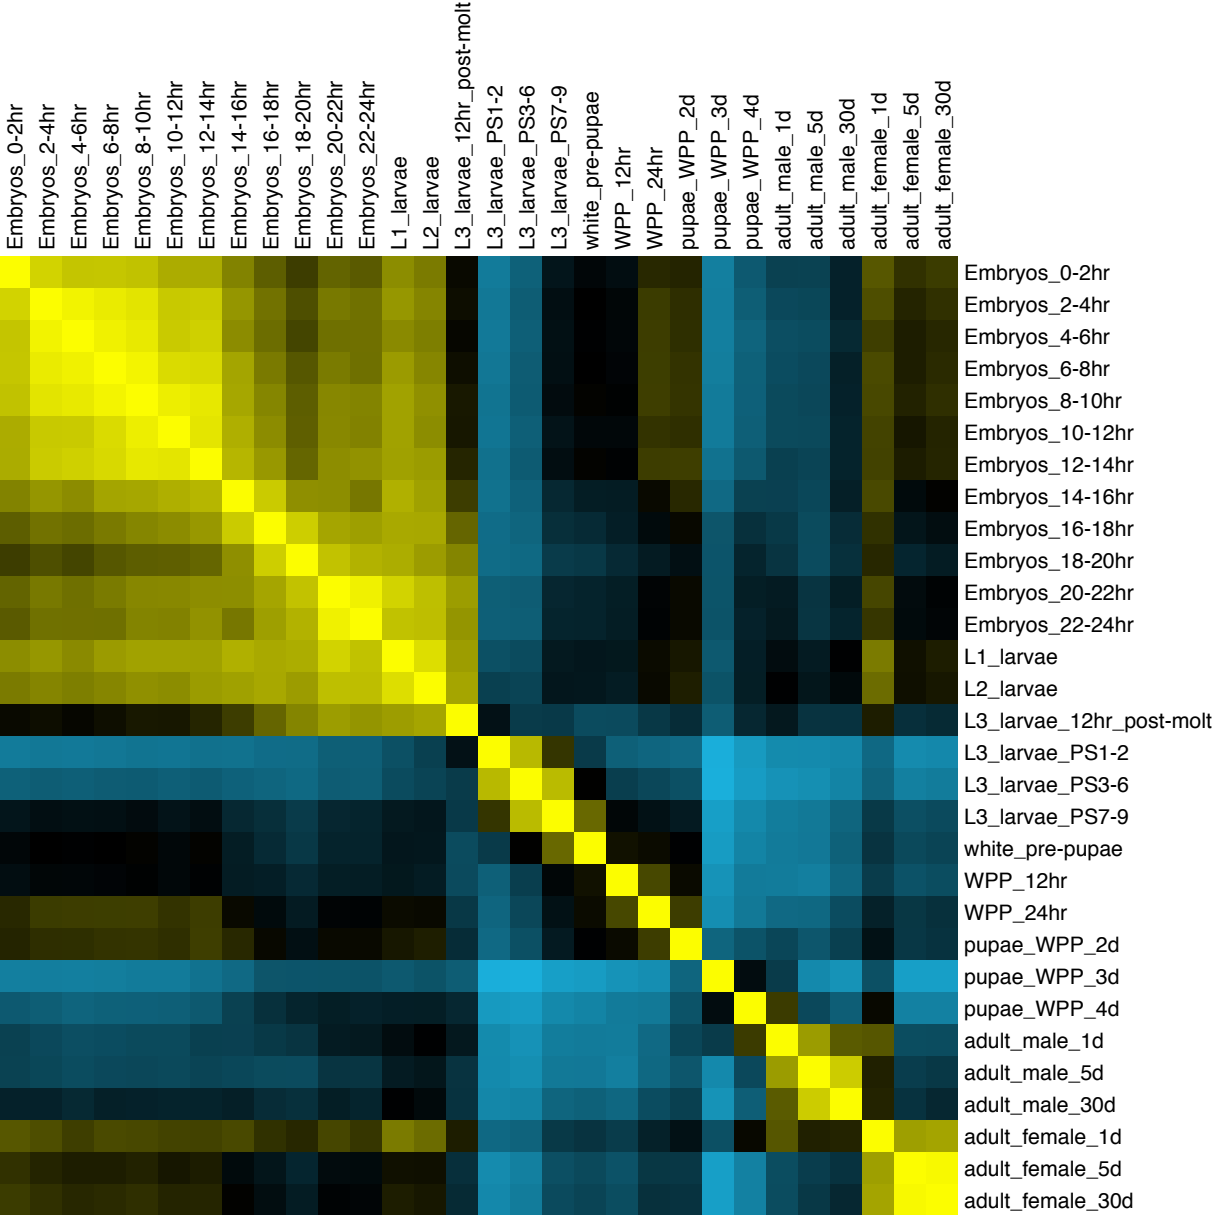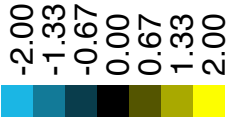

Supplement: NIHMS256122-supplement-3.pdf [file NIHMS256122-supplement-3.pdf]

# Supplementary Figure 3

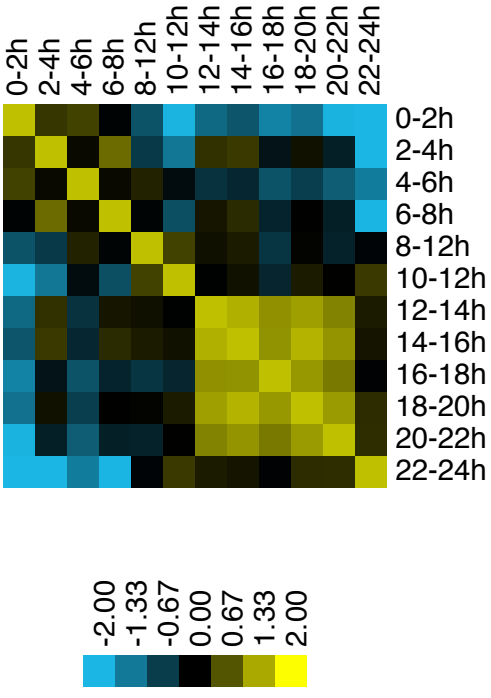

Supplement: NIHMS256122-supplement-4.pdf [file NIHMS256122-supplement-4.pdf]

# Supplemental Figure 4

a.

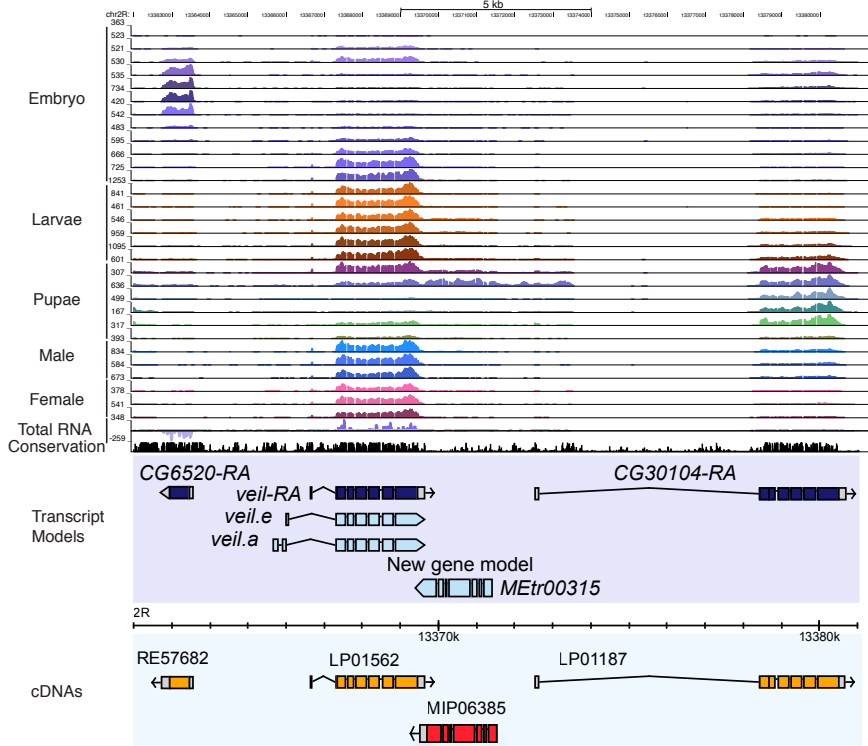

b.

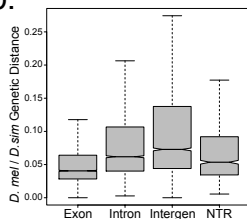

c.

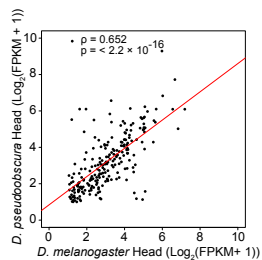

d.

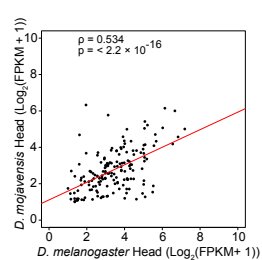

Supplement: NIHMS256122-supplement-5.pdf [file NIHMS256122-supplement-5.pdf]

# Supplemental Figure 5

a.

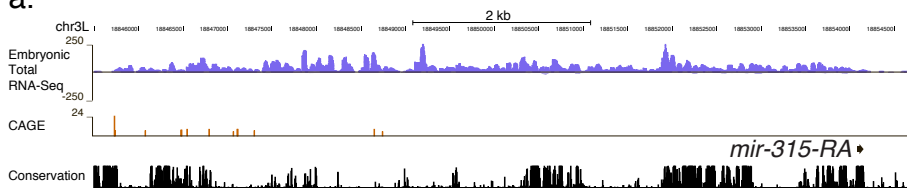

b.

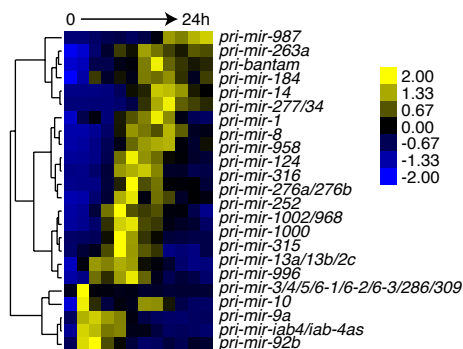

Supplement: NIHMS256122-supplement-6.pdf [file NIHMS256122-supplement-6.pdf]

# Supplementary Figure 6

## Total RNA Tiling Arrays

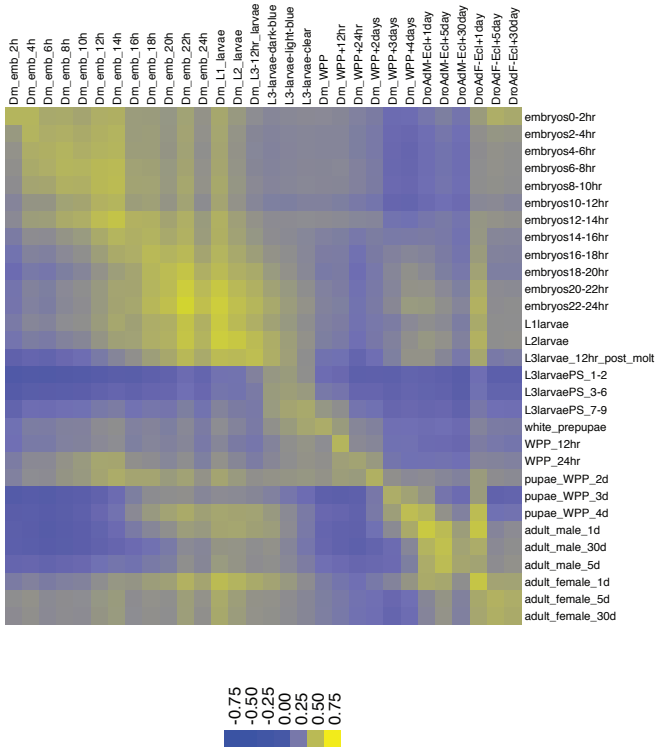

Short Poly(A)+ RNA-Seq

Supplement: NIHMS256122-supplement-7.pdf [file NIHMS256122-supplement-7.pdf]

# Supplementary Figure 7

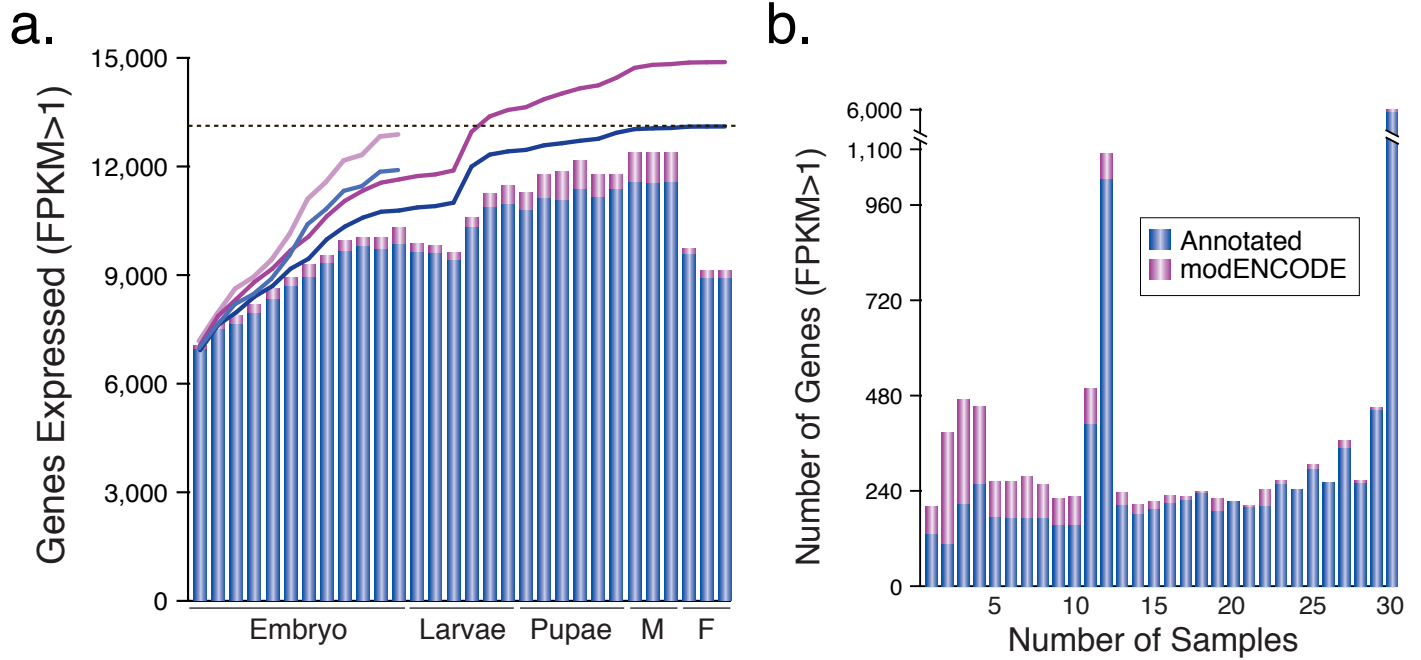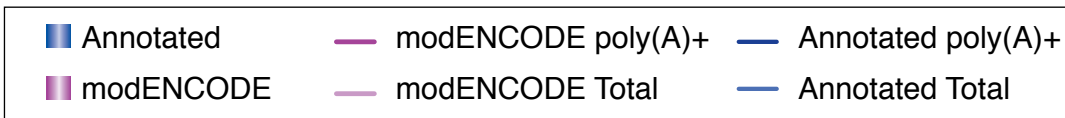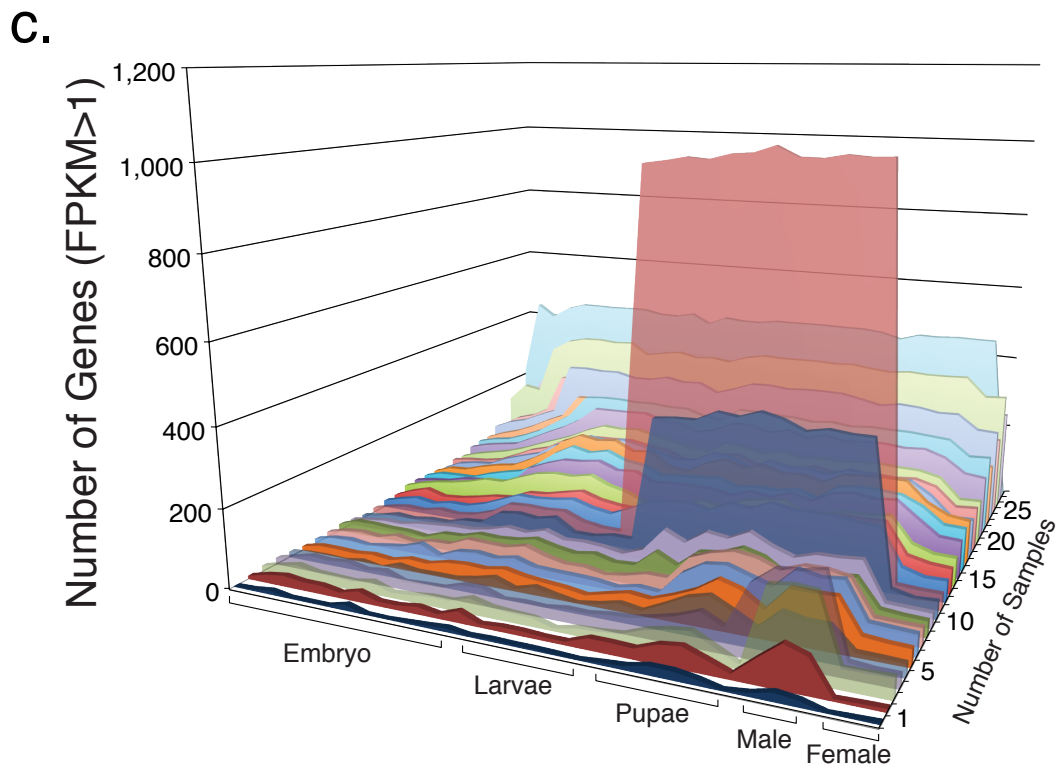

Supplement: NIHMS256122-supplement-8.pdf [file NIHMS256122-supplement-8.pdf]

# Supplementary Figure 8

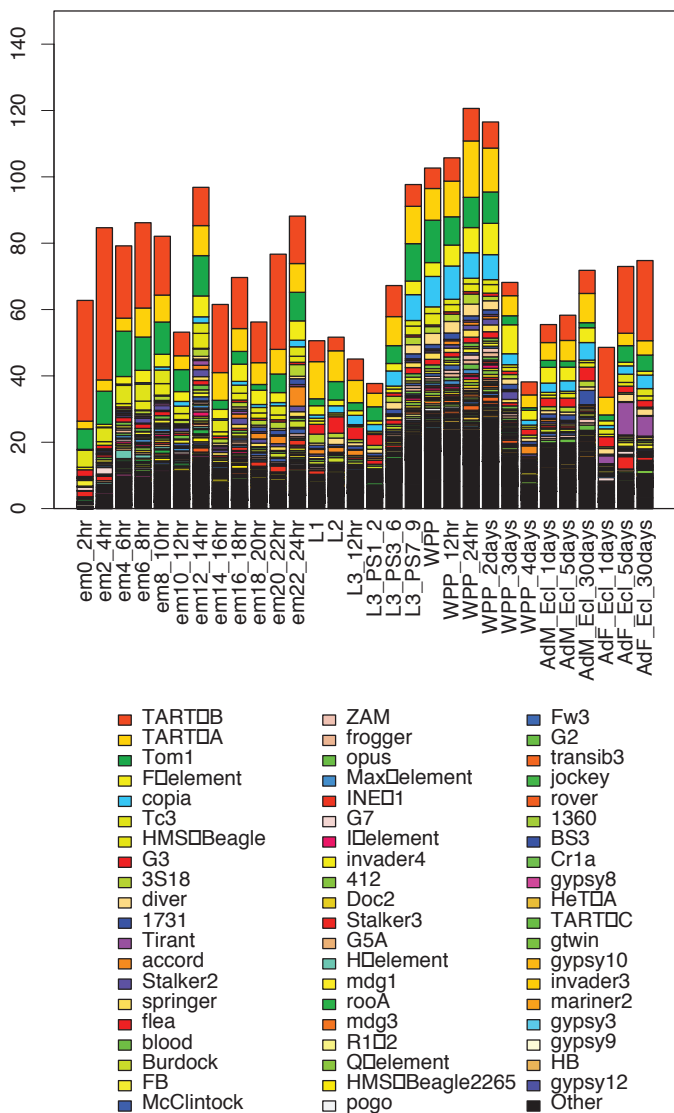

Supplement: NIHMS256122-supplement-9.pdf [file NIHMS256122-supplement-9.pdf]
